# Supplementary material
Source: Elsevier journal article supplement (https://rcastoragev2.blob.core.windows.net/b31b1e30eeacf19edc9c12f8dc225668/mmc1.pdf)
Supplement: mmc1 [file mmc1.pdf]

# THE LANCET

## Global Health

### Supplementary appendix

This appendix formed part of the original submission and has been peer reviewed.  
We post it as supplied by the authors.

Supplement to: Su S, Wong WCW, Zou Z, et al. Cost-effectiveness of universal screening for chronic hepatitis B virus infection in China: an economic evaluation. *Lancet Glob Health* 2022; **10**: e278–87.

## Appendix:

**Table S1. A list of parameters used in the decision-analytic Markov model.**

|                                                             | Base case                            | Range                                                      | PSA distribution                                                      | Data source |
|-------------------------------------------------------------|--------------------------------------|------------------------------------------------------------|-----------------------------------------------------------------------|-------------|
| <b><i>Natural disease progression</i></b>                   |                                      |                                                            |                                                                       |             |
| From chronic HBV carrier to:                                |                                      |                                                            |                                                                       |             |
| Active CHB                                                  | Age 20-39: 0.0023<br>Age ≥40: 0.0054 | Age 20-39:<br>0.00115-0.00345<br>Age ≥40:<br>0.0027-0.0081 | Age 20-39: Beta (3.99,<br>1730.14)<br>Age ≥40: Beta (3.97,<br>731.77) | 1-5         |
| From active CHB to:                                         |                                      |                                                            |                                                                       |             |
| Compensated cirrhosis                                       | 0.029                                | 0.015-0.058                                                | Beta (4.14, 138.53)                                                   | 6           |
| Hepatocellular carcinoma                                    | Age 20-39: 0.002<br>Age ≥40: 0.0061  | Age 20-39:<br>0.001-0.003<br>Age ≥40:<br>0.00305-0.00915   | Age 20-39: Beta (3.99,<br>1991.01)<br>Age ≥40: Beta (3.97,<br>657.7)  | 2,3,5,7,8   |
| From Compensated cirrhosis to:                              |                                      |                                                            |                                                                       |             |
| Decompensated cirrhosis                                     | 0.073                                | 0.03-0.1                                                   | Beta (5.42, 68.77)                                                    | 9-14        |
| Hepatocellular carcinoma                                    | 0.034                                | 0.01-0.1                                                   | Beta (2.76, 78.35)                                                    | 7,11,14-18  |
| HBV-related death                                           | 0.031                                | 0.031-0.038                                                | Beta (9.28, 290.11)                                                   | 7,19        |
| From Decompensated cirrhosis to:                            |                                      |                                                            |                                                                       |             |
| Hepatocellular carcinoma                                    | 0.034                                | 0.01-0.1                                                   | Beta (1.90, 54.12)                                                    | 7,11,14-18  |
| HBV-related death                                           | 0.17                                 | 0.1-0.25                                                   | Beta (4.73, 23.07)                                                    | 7,14,20-22  |
| From Hepatocellular carcinoma to:                           |                                      |                                                            |                                                                       |             |
| HBV-related death                                           | 0.45                                 | 0.22-0.7                                                   | Beta (1.66, 2.02)                                                     | 11,15,22,23 |
| <b><i>Treatment-related annual transition estimates</i></b> |                                      |                                                            |                                                                       |             |
| From active CHB to:                                         |                                      |                                                            |                                                                       |             |
| Compensated cirrhosis                                       | 0.002                                | 0.001-0.002                                                | Beta (3.99, 1991.01)                                                  | 24-27       |
| Hepatocellular carcinoma                                    | 0.002                                | 0.001-0.002                                                | Beta (3.99, 1991.01)                                                  | 28          |
| From Compensated cirrhosis to:                              |                                      |                                                            |                                                                       |             |
| Decompensated cirrhosis                                     | 0.019                                | 0.009-0.046                                                | Beta (3.52, 181.17)                                                   | 24,29       |
| Hepatocellular carcinoma                                    | 0.02                                 | 0.016-0.044                                                | Beta (24.48, 1199.52)                                                 | 30,31       |
| HBV-related death                                           | 0.017                                | 0.012-0.048                                                | Beta (2.82, 163.29)                                                   | 32-35       |
| From Decompensated cirrhosis to:                            |                                      |                                                            |                                                                       |             |
| Hepatocellular carcinoma                                    | 0.024                                | 0.006-0.081                                                | Beta (2.47, 100.63)                                                   | 28,30,36    |
| Liver transplantation                                       | 0.017                                | 0.001-0.042                                                | Beta (1.25, 72.03)                                                    | 24,37       |
| HBV-related death                                           | 0.095                                | 0.056-0.14                                                 | Beta (5.27, 50.25)                                                    | 32          |
| From Hepatocellular carcinoma to:                           |                                      |                                                            |                                                                       |             |
| Liver transplantation                                       | 0.006                                | 0.001-0.03                                                 | Beta (1.43, 236.13)                                                   | 24,37       |
| HBV-related death                                           | 0.26                                 | 0.25-0.27                                                  | Beta (4.74, 13.50)                                                    | 38          |
| <b><i>Utility weight</i></b>                                |                                      |                                                            |                                                                       |             |
| Chronic HBV infection                                       | 0.79                                 | 0.74-0.84                                                  | Beta (51.63, 13.73)                                                   | 39-47       |
| Compensated cirrhosis                                       | 0.73                                 | 0.69-0.78                                                  | Beta (89.19, 32.99)                                                   |             |
| Decompensated cirrhosis                                     | 0.65                                 | 0.63-0.67                                                  | Beta (369.04, 198.71)                                                 |             |

|                                                      |       |             |                       |       |
|------------------------------------------------------|-------|-------------|-----------------------|-------|
| Hepatocellular carcinoma                             | 0.38  | 0.36-0.41   | Beta (223.44, 364.56) |       |
| Liver transplantation                                | 0.67  | 0.64-0.69   | Beta (163.93, 80.74)  |       |
| <b>Costs (\$USD, 2020)</b>                           |       |             |                       |       |
| <i>Screening cost</i>                                |       |             |                       |       |
| HBsAg rapid test                                     | 2.85  | 2.3-3.4     | Gamma (26.85,9.42)    |       |
| HBsAg and HBsAb test<br>("Two tests")                | 5.7   | 4.5-7.0     | Gamma (22.56,3.96)    |       |
| HBsAg/HBsAb/HBcAb<br>("Three tests")                 | 8.55  | 6.8-10.3    | Gamma (18.28,2.14)    |       |
| HBsAg/HBsAb/HBcAg/HBcAb<br>/HBcAb ("Five tests")     | 14.25 | 10.5-17.0   | Gamma (14.44,1.01)    |       |
| <i>Test cost</i>                                     |       |             |                       |       |
| Liver function test                                  | 3.3   | 2.6-4       | Gamma (22.22,6.73)    |       |
| HBV DNA test                                         | 12.8  | 10.2-15.4   | Gamma (24.24,1.89)    |       |
| Transient elastography                               | 21.2  | 17.0-25.4   | Gamma (25.48,1.20)    |       |
| <i>Vaccination cost</i>                              |       |             |                       |       |
| Vaccination for adults (per item)                    | 4.71  | 2.15-7.30   | Gamma (3.28,0.70)     | 48    |
| <i>Treatment cost</i>                                |       |             |                       |       |
| Generic entecavir 0.5mg * 21<br>tablets              | 0.55  | 0.44-1.66   | Gamma(25.00,45.45)    | 49    |
| Generic tenofovir <sup>#</sup> 300mg * 30<br>tablets | 1.25  | 1-1.5       | Gamma(25.00,20.00)    | 49    |
| Branded entecavir 0.5mg *<br>7tablets                | 20.22 | 16.17-24.26 | Gamma(24.93,1.23)     | 49    |
| Branded tenofovir <sup>#</sup> 300mg *<br>30tablets  | 47.06 | 37.65-56.47 | Gamma(25.01,0.53)     | 49    |
| Active chronic hepatitis B                           | 2760  | 2200-3310   | Gamma (24.29,0.0088)  | 50    |
| Compensated cirrhosis                                | 4330  | 3460-5200   | Gamma (24.77,0.0057)  | 50    |
| Decompensated cirrhosis                              | 5523  | 4420-6630   | Gamma (25.21,0.0046)  | 50    |
| Hepatocellular carcinoma                             | 7301  | 5840-8760   | Gamma (23.69,0.0032)  | 50    |
| Liver transplantation                                | 35701 | 28560-42840 | Gamma (27.11,1.08)    | 50,51 |
| After liver transplantation<br>follow-up (per year)  | 8393  | 6710-10070  | Gamma (24.37,0.0029)  | 52    |
| <b>Screening Methods</b>                             |       |             |                       |       |
| Rapid HBsAg test                                     |       |             |                       | 53    |
| Sensitivity                                          | 0.9   | 0.891-0.908 | Point-estimate        |       |
| Specificity                                          | 0.995 | 0.994-0.995 | Point-estimate        |       |
| HbsAg/HbsAb ("Two tests")                            |       |             |                       | 54    |
| Sensitivity                                          | 0.932 | 0.851-0.985 | Point-estimate        |       |
| Specificity                                          | 0.931 | 0.851-0.999 | Point-estimate        |       |
| HbsAg/HbsAb/HBcAb ("Three tests")                    |       |             |                       |       |

|                                              |       |             |                |       |
|----------------------------------------------|-------|-------------|----------------|-------|
| Sensitivity                                  | 0.941 | 0.87-0.99   | Point-estimate |       |
| Specificity                                  | 0.98  | 0.922-0.999 | Point-estimate |       |
| HBsAg/HBsAb/HBeAg/HBeAb/HBcAb ("Five tests") |       |             |                | 54    |
| Sensitivity                                  | 0.955 | 0.889-0.994 | Point-estimate |       |
| Specificity                                  | 0.998 | 0.993-1.00  | Point-estimate |       |
| Discount rate: costs (%)                     | 3     | 0-6         | Point-estimate | 55,56 |
| Discount rate: health outcomes (%)           | 3     | 0-6         | Point-estimate | 55,56 |

PSA, probabilistic sensitivity analysis; CHB, chronic hepatitis B; HBsAg, hepatitis B surface antigen; HBsAb, hepatitis B surface antibody; HBeAg, **hepatitis B e antigen; HBeAb, hepatitis B e antibody; HBcAb, hepatitis B core antibody.**

<sup>#</sup>The widely-available form of tenofovir in China was tenofovir disoproxil fumarate. Tenofovir alafenamide only became available in China in late 2020 and was not included in this analysis.

### **Citations for the table in the main text**

Assuming all HBV seronegative individuals will be referred for vaccination, with a 55-72% vaccine acceptance rate. <sup>57</sup>

<sup>#</sup> Treatment coverage rate was estimated from available published data <sup>58</sup> with further adjustment based on HBV serology and virology data in China. <sup>59-68</sup>

**Figure S1. Schematic diagram of the Markov model for HBV infection and disease progression** (CHB, chronic hepatitis B; HBV, hepatitis B virus; HCC, hepatocellular carcinoma.).

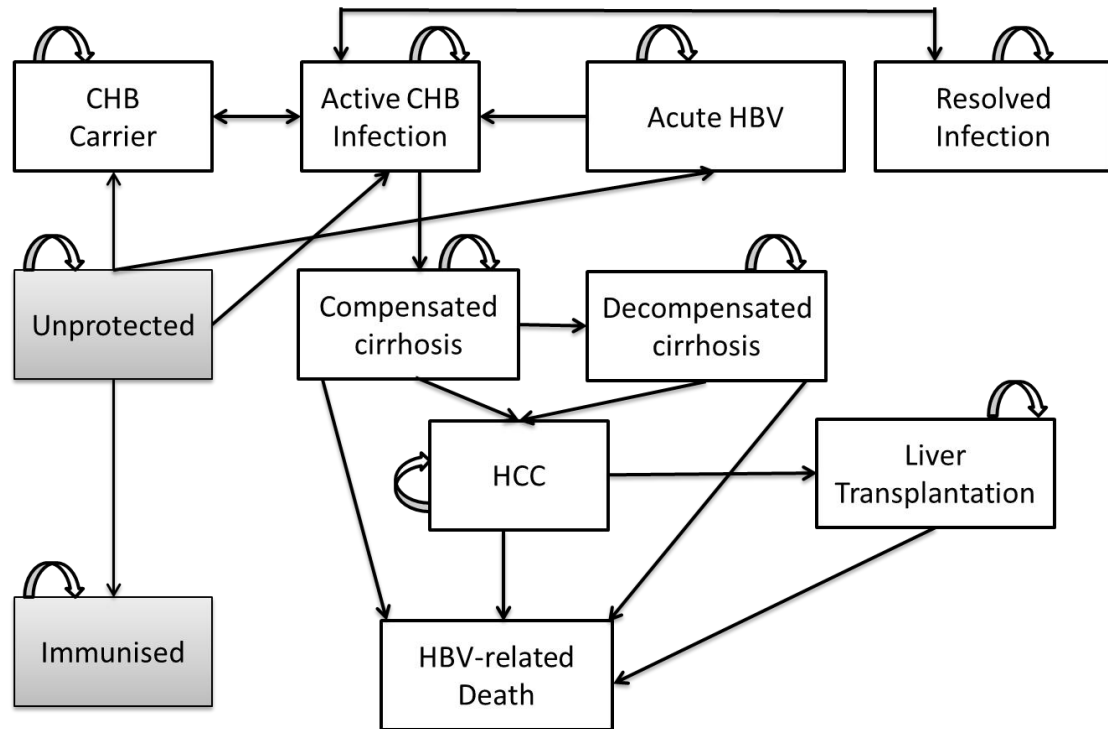

**Figure S2. HBsAg+ rates and percentage of individuals who have received an HBV vaccine by age. Data were collected from published literature<sup>59-64,66,67,69-84</sup>. Each coloured line represents an individual study (HBsAg, hepatitis B surface antigen; HBV, hepatitis B virus).**

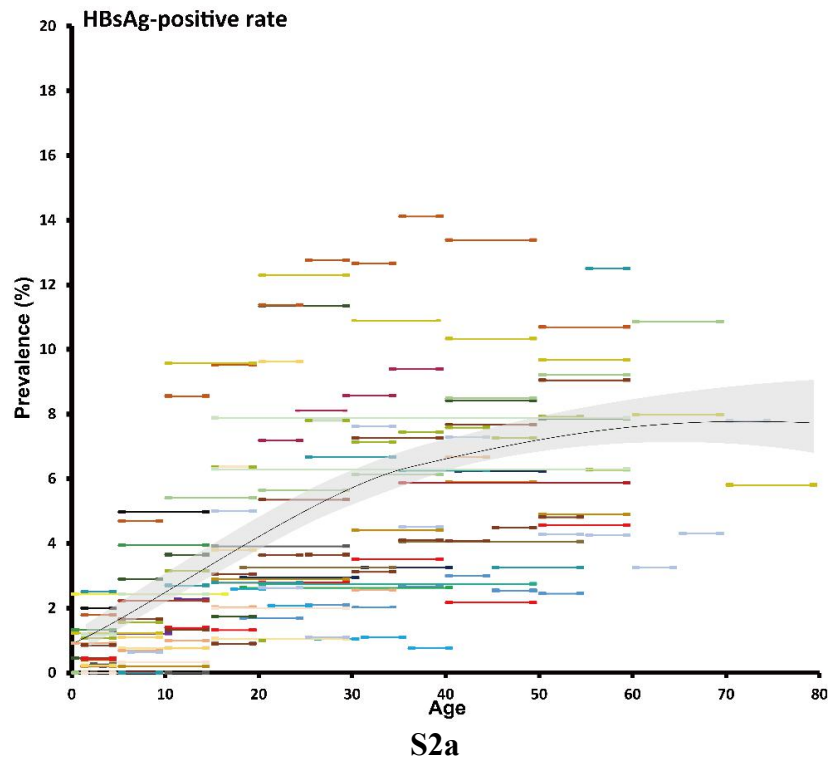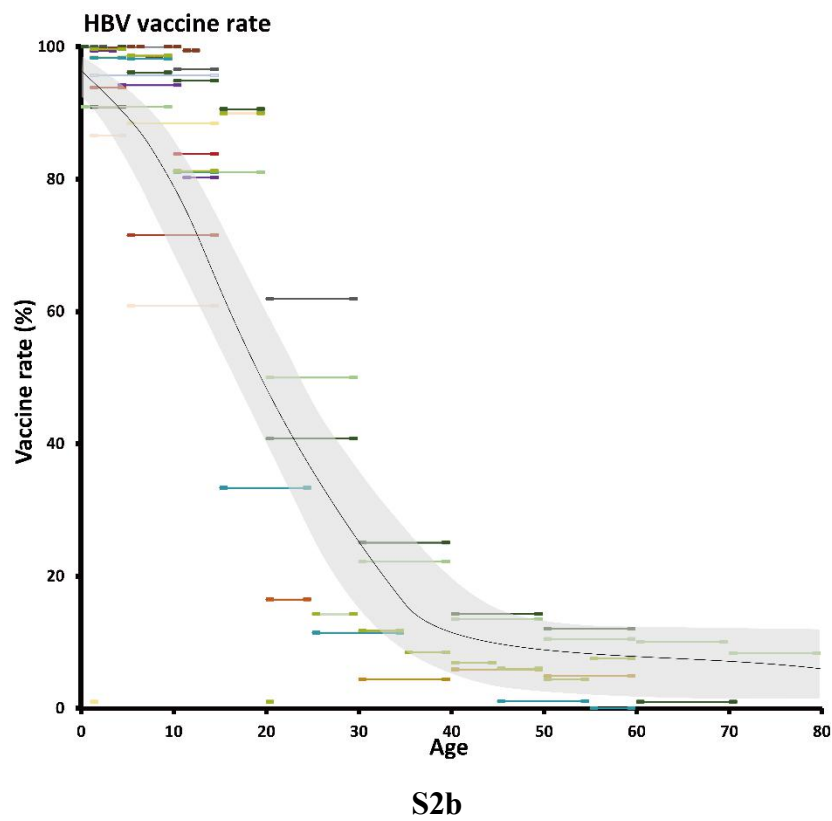

**Table S2. Comparison of the incremental cost, incremental quality-adjusted life years (QALYs) and incremental cost-effectiveness ratio (ICER) of 60 HBV universal screening strategy initiated in 2021 with the status quo (19% background screening).**

| Screening age | Strategy                              | QALYs     | Incremental QALYs | Cost(US\$) | Incremental costs (US\$) | ICER vs. status quo* (US\$/QALY) | ICER vs. next screening# (US\$/QALY) |
|---------------|---------------------------------------|-----------|-------------------|------------|--------------------------|----------------------------------|--------------------------------------|
| (Years)       | screening method                      |           |                   |            |                          |                                  |                                      |
| 0-80          | Status quo (19% background screening) | 1,465,674 |                   | 13,869,850 |                          |                                  |                                      |
| 18-70         | HBsAg rapid test                      | 1,466,813 | 1,139             | 15,856,574 | 1,986,724                | 1,744                            | 1,744                                |
|               | HBsAg/HBsAb                           | 1,467,197 | 1,523             | 16,170,394 | 2,300,544                | 1,510                            | 817                                  |
|               | HBsAg/HBsAb/HBcAb                     | 1,467,201 | 1,528             | 16,257,855 | 2,388,005                | 1,563                            | 19,590                               |
|               | HBsAg/HBsAb/HBeAg/HBeAb/HBcAb         | 1,467,225 | 1,551             | 16,689,450 | 2,819,600                | 1,817                            | 18,053                               |
| 18-60         | HBsAg rapid test                      | 1,466,651 | 978               | 15,389,451 | 1,519,600                | 1,554                            | 1,554                                |
|               | HBsAg/HBsAb                           | 1,466,996 | 1,323             | 15,612,544 | 1,742,694                | 1,318                            | 647                                  |
|               | HBsAg/HBsAb/HBcAb                     | 1,467,000 | 1,326             | 15,685,550 | 1,815,700                | 1,369                            | 20,682                               |
|               | HBsAg/HBsAb/HBeAg/HBeAb/HBcAb         | 1,467,021 | 1,347             | 16,034,875 | 2,165,025                | 1,607                            | 16,798                               |
| 18-50         | HBsAg rapid test                      | 1,466,422 | 749               | 14,896,090 | 1,026,240                | 1,370                            | 1,370                                |
|               | HBsAg/HBsAb                           | 1,466,700 | 1,027             | 15,035,535 | 1,165,685                | 1,135                            | 502                                  |
|               | HBsAg/HBsAb/HBcAb                     | 1,466,703 | 1,029             | 15,091,979 | 1,222,129                | 1,187                            | 23,294                               |
|               | HBsAg/HBsAb/HBeAg/HBeAb/HBcAb         | 1,466,719 | 1,045             | 15,350,632 | 1,480,782                | 1,417                            | 15,990                               |
| 18-40         | HBsAg rapid test                      | 1,466,145 | 472               | 14,452,820 | 582,970                  | 1,235                            | 1,235                                |
|               | HBsAg/HBsAb                           | 1,466,327 | 653               | 14,530,708 | 660,858                  | 1,012                            | 430                                  |
|               | HBsAg/HBsAb/HBcAb                     | 1,466,328 | 654               | 14,569,259 | 699,408                  | 1,069                            | 27,413                               |
|               | HBsAg/HBsAb/HBeAg/HBeAb/HBcAb         | 1,466,338 | 665               | 14,736,251 | 866,401                  | 1,303                            | 16,211                               |
| 18-30         | HBsAg rapid test                      | 1,465,897 | 224               | 14,121,467 | 251,617                  | 1,125                            | 1,125                                |
|               | HBsAg/HBsAb                           | 1,465,979 | 306               | 14,161,510 | 291,660                  | 954                              | 487                                  |
|               | HBsAg/HBsAb/HBcAb                     | 1,465,980 | 307               | 14,183,229 | 313,378                  | 1,022                            | 29,362                               |
|               | HBsAg/HBsAb/HBeAg/HBeAb/HBcAb         | 1,465,985 | 311               | 14,271,205 | 401,355                  | 1,289                            | 18,266                               |
| 30-70         | HBsAg rapid test                      | 1,466,611 | 937               | 15,632,568 | 1,762,718                | 1,881                            | 1,881                                |
|               | HBsAg/HBsAb                           | 1,466,922 | 1,248             | 15,909,208 | 2,039,358                | 1,634                            | 890                                  |
|               | HBsAg/HBsAb/HBcAb                     | 1,466,926 | 1,252             | 15,976,547 | 2,106,696                | 1,683                            | 17,835                               |
|               | HBsAg/HBsAb/HBeAg/HBeAb/HBcAb         | 1,466,945 | 1,272             | 16,327,244 | 2,457,394                | 1,933                            | 17,910                               |
| 30-60         | HBsAg rapid test                      | 1,466,450 | 776               | 15,165,445 | 1,295,595                | 1,669                            | 1,669                                |
|               | HBsAg/HBsAb                           | 1,466,721 | 1,048             | 15,351,358 | 1,481,508                | 1,414                            | 684                                  |
|               | HBsAg/HBsAb/HBcAb                     | 1,466,724 | 1,051             | 15,404,241 | 1,534,391                | 1,460                            | 18,614                               |
|               | HBsAg/HBsAb/HBeAg/HBeAb/HBcAb         | 1,466,741 | 1,067             | 15,672,669 | 1,802,818                | 1,689                            | 16,298                               |
| 30-50         | HBsAg rapid test                      | 1,466,221 | 547               | 14,672,084 | 802,234                  | 1,466                            | 1,466                                |
|               | HBsAg/HBsAb                           | 1,466,425 | 752               | 14,774,350 | 904,500                  | 1,203                            | 499                                  |
|               | HBsAg/HBsAb/HBcAb                     | 1,466,427 | 754               | 14,810,670 | 940,820                  | 1,248                            | 20,944                               |
|               | HBsAg/HBsAb/HBeAg/HBeAb/HBcAb         | 1,466,439 | 766               | 14,988,425 | 1,118,575                | 1,461                            | 15,000                               |
| 30-40         | HBsAg rapid test                      | 1,465,944 | 270               | 14,228,814 | 358,964                  | 1,329                            | 1,329                                |
|               | HBsAg/HBsAb                           | 1,466,052 | 378               | 14,269,523 | 399,672                  | 1,057                            | 377                                  |
|               | HBsAg/HBsAb/HBcAb                     | 1,466,052 | 379               | 14,287,950 | 418,100                  | 1,104                            | 25,688                               |
|               | HBsAg/HBsAb/HBeAg/HBeAb/HBcAb         | 1,466,058 | 385               | 14,374,045 | 504,194                  | 1,310                            | 14,409                               |
| 40-70         | HBsAg rapid test                      | 1,466,374 | 700               | 15,322,416 | 1,452,565                | 2,074                            | 2,074                                |
|               | HBsAg/HBsAb                           | 1,466,590 | 916               | 15,564,234 | 1,694,384                | 1,850                            | 1,122                                |
|               | HBsAg/HBsAb/HBcAb                     | 1,466,593 | 919               | 15,615,312 | 1,745,462                | 1,899                            | 16,160                               |
|               | HBsAg/HBsAb/HBeAg/HBeAb/HBcAb         | 1,466,607 | 933               | 15,890,506 | 2,020,655                | 2,165                            | 19,203                               |
| 40-60         | HBsAg rapid test                      | 1,466,213 | 539               | 14,855,292 | 985,442                  | 1,827                            | 1,827                                |
|               | HBsAg/HBsAb                           | 1,466,389 | 716               | 15,006,384 | 1,136,533                | 1,588                            | 857                                  |
|               | HBsAg/HBsAb/HBcAb                     | 1,466,391 | 718               | 15,043,007 | 1,173,157                | 1,634                            | 16,451                               |
|               | HBsAg/HBsAb/HBeAg/HBeAb/HBcAb         | 1,466,403 | 729               | 15,235,931 | 1,366,080                | 1,874                            | 17,196                               |
| 40-50         | HBsAg rapid test                      | 1,465,984 | 310               | 14,361,932 | 492,081                  | 1,586                            | 1,586                                |
|               | HBsAg/HBsAb                           | 1,466,093 | 420               | 14,429,375 | 559,525                  | 1,333                            | 616                                  |
|               | HBsAg/HBsAb/HBcAb                     | 1,466,094 | 421               | 14,449,436 | 579,586                  | 1,377                            | 17,922                               |
|               | HBsAg/HBsAb/HBeAg/HBeAb/HBcAb         | 1,466,101 | 427               | 14,551,687 | 681,837                  | 1,595                            | 15,495                               |
| 50-70         | HBsAg rapid test                      | 1,466,086 | 413               | 14,872,352 | 1,002,502                | 2,428                            | 2,428                                |
|               | HBsAg/HBsAb                           | 1,466,200 | 526               | 15,053,009 | 1,183,159                | 2,248                            | 1,592                                |
|               | HBsAg/HBsAb/HBcAb                     | 1,466,202 | 528               | 15,085,518 | 1,215,668                | 2,301                            | 15,209                               |
|               | HBsAg/HBsAb/HBeAg/HBeAb/HBcAb         | 1,466,210 | 537               | 15,266,399 | 1,396,548                | 2,603                            | 22,056                               |
| 50-60         | HBsAg rapid test                      | 1,465,925 | 252               | 14,405,229 | 535,379                  | 2,127                            | 2,127                                |
|               | HBsAg/HBsAb                           | 1,465,999 | 326               | 14,495,159 | 625,309                  | 1,919                            | 1,213                                |
|               | HBsAg/HBsAb/HBcAb                     | 1,466,001 | 327               | 14,513,213 | 643,363                  | 1,967                            | 15,008                               |
|               | HBsAg/HBsAb/HBeAg/HBeAb/HBcAb         | 1,466,006 | 332               | 14,611,823 | 741,973                  | 2,234                            | 19,374                               |
| 60-70         | HBsAg rapid test                      | 1,465,857 | 183               | 14,391,557 | 521,706                  | 2,844                            | 2,844                                |
|               | HBsAg/HBsAb                           | 1,465,902 | 229               | 14,492,268 | 622,418                  | 2,721                            | 2,223                                |
|               | HBsAg/HBsAb/HBcAb                     | 1,465,903 | 230               | 14,508,487 | 638,636                  | 2,780                            | 15,409                               |
|               | HBsAg/HBsAb/HBeAg/HBeAb/HBcAb         | 1,465,907 | 233               | 14,600,597 | 730,747                  | 3,132                            | 25,935                               |

Willingness-to-pay (WTP), US\$30,828;

\* Screening strategies compared with the status quo (19% background screening);

# Screening strategy compared with next screening strategy within age group, e.g. HBsAg rapid test vs. status quo; HBsAg/HBsAb test vs. HBsAg rapid test; HBsAg/HBsAb/HBcAb test vs. HBsAg/HBsAb test; HBsAg/HBsAb/HBeAg/HBeAb/HBcAb test vs. HBsAg/HBsAb/HBcAb test;

Abbreviation: HBsAg, hepatitis B surface antigen; HBsAb, hepatitis B surface antibody; HBeAg, hepatitis B e antigen; HBeAb, hepatitis B e antibody; HBcAb, hepatitis B core antibody.

**Figure S3. Tornado diagram demonstrating results of one-way sensitivity analyses of ten most important parameters that affect the cost-effectiveness of HBV universal screening with ‘five-test’ for 18-70 years.**

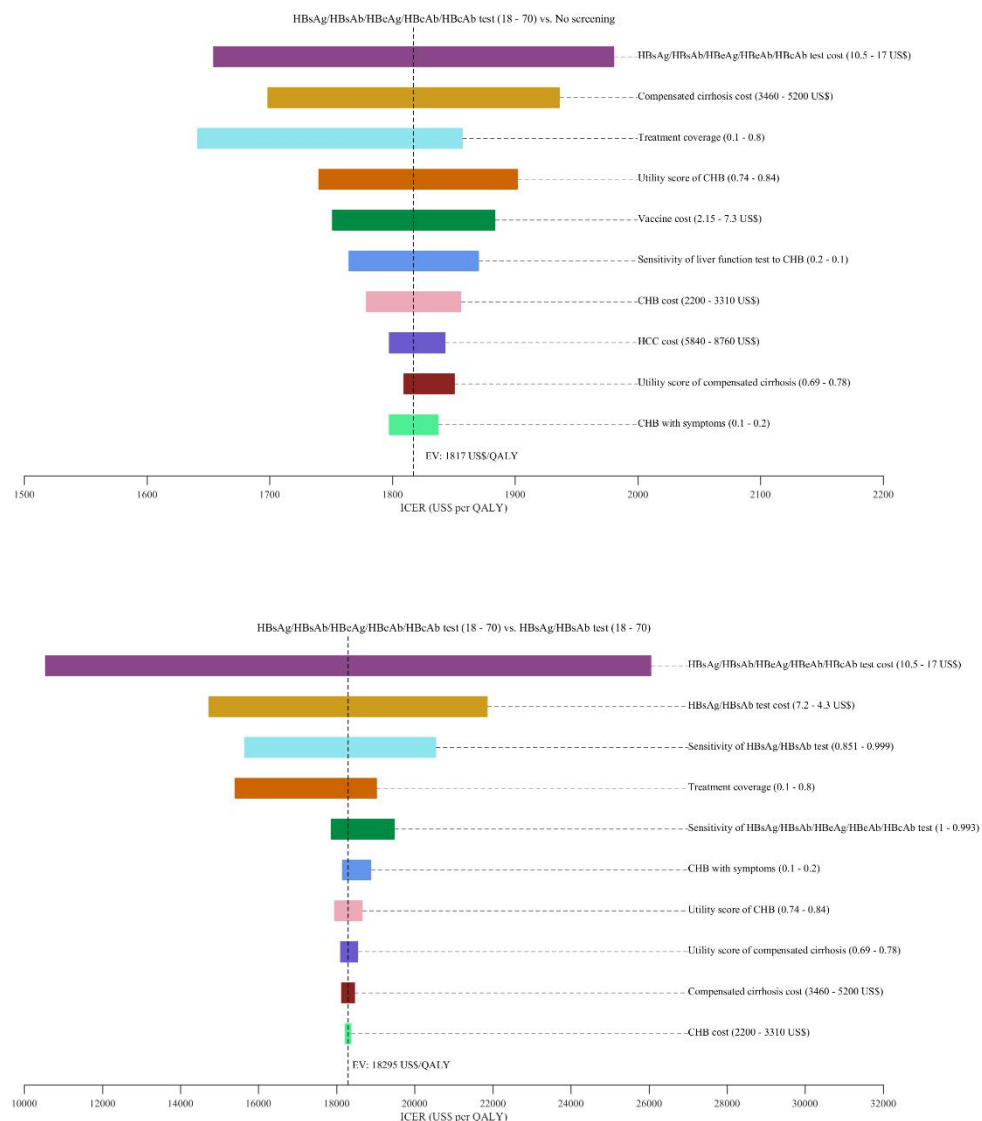

Abbreviation: CHB, chronic hepatitis B; HCC, hepatocellular carcinoma; ICER, incremental cost-effectiveness ratio; QALY, quality-adjusted life-years; HBsAg, hepatitis B surface antigen; HBsAb, hepatitis B surface antibody; HBeAg, hepatitis B e antigen; HBeAb, hepatitis B e antibody; HBcAb, hepatitis B core antibody.



## Reference:

1. Hung HF, Chen TH. Probabilistic cost-effectiveness analysis of the long-term effect of universal hepatitis B vaccination: an experience from Taiwan with high hepatitis B virus infection and Hepatitis B e Antigen positive prevalence. *Vaccine* 2009; **27**(48): 6770-6.
2. Jacobs RJ, Saab S, Meyerhoff AS. The cost effectiveness of hepatitis immunization for US college students. *Journal of American college health : J of ACH* 2003; **51**(6): 227-36.
3. Tilson L, Thornton L, O'Flanagan D, Johnson H, Barry M. Cost effectiveness of hepatitis B vaccination strategies in Ireland: an economic evaluation. *European journal of public health* 2008; **18**(3): 275-82.
4. La Torre G, Mannocci A, Saulle R, et al. Economic evaluation of HBV vaccination: A systematic review of recent publications (2000-2013). *Human vaccines & immunotherapeutics* 2016; **12**(9): 2299-311.
5. Fendrick AM, Lee JH, LaBarge C, Glick HA. Clinical and economic impact of a combination Haemophilus influenzae and Hepatitis B vaccine: estimating cost-effectiveness using decision analysis. *Archives of pediatrics & adolescent medicine* 1999; **153**(2): 126-36.
6. Wong WW, Woo G, Heathcote EJ, Krahn M. Disease burden of chronic hepatitis B among immigrants in Canada. *Canadian journal of gastroenterology = Journal canadien de gastroenterologie* 2013; **27**(3): 137-47.
7. Fattovich G, Bortolotti F, Donato F. Natural history of chronic hepatitis B: special emphasis on disease progression and prognostic factors. *Journal of hepatology* 2008; **48**(2): 335-52.
8. Wen WH, Chang MH, Hsu HY, Ni YH, Chen HL. The development of hepatocellular carcinoma among prospectively followed children with chronic hepatitis B virus infection. *The Journal of pediatrics* 2004; **144**(3): 397-9.
9. Zhenhao J. [Cost-effectiveness analysis of neonatal hepatitis B immunization strategies in China]. *Xi'an: Xi'an Jiaotong University* 2012.
10. Hutton DW, Tan D, So SK, Brandeau ML. Cost-effectiveness of screening and vaccinating Asian and Pacific Islander adults for hepatitis B. *Annals of internal medicine* 2007; **147**(7): 460-9.
11. Siddiqui MR, Gay N, Edmunds WJ, Ramsay M. Economic evaluation of infant and adolescent hepatitis B vaccination in the UK. *Vaccine* 2011; **29**(3): 466-75.
12. Hutton DW, So SK, Brandeau ML. Cost-effectiveness of nationwide hepatitis B catch-up vaccination among children and adolescents in China. *Hepatology* 2010; **51**(2): 405-14.
13. Kanwal F, Gralnek IM, Martin P, Dulai GS, Farid M, Spiegel BM. Treatment alternatives for chronic hepatitis B virus infection: a cost-effectiveness analysis. *Annals of internal medicine* 2005; **142**(10): 821-31.
14. Wu B, Li T, Chen H, Shen J. Cost-effectiveness of nucleoside analog therapy for hepatitis B in China: a Markov analysis. *Value in health : the journal of the International Society for Pharmacoeconomics and Outcomes Research* 2010; **13**(5): 592-600.
15. Thiele M, Gluud LL, Fiella AD, Dahl EK, Krag A. Large variations in risk of hepatocellular carcinoma and mortality in treatment naive hepatitis B patients: systematic review with meta-analyses. *PloS one* 2014; **9**(9): e107177.
16. Liaw YF, Chu CM. Hepatitis B virus infection. *Lancet (London, England)* 2009; **373**(9663): 582-92.
17. Elgouhari HM, Abu-Rajab Tamimi TI, Carey WD. Hepatitis B virus infection: understanding its epidemiology, course, and diagnosis. *Cleveland Clinic journal of medicine* 2008; **75**(12): 881-9.

18. Liaw YF. Natural history of chronic hepatitis B virus infection and long-term outcome under treatment. *Liver international : official journal of the International Association for the Study of the Liver* 2009; **29 Suppl 1**: 100-7.
19. Fattovich G, Pantalena M, Zagni I, Realdi G, Schalm SW, Christensen E. Effect of hepatitis B and C virus infections on the natural history of compensated cirrhosis: a cohort study of 297 patients. *The American journal of gastroenterology* 2002; **97**(11): 2886-95.
20. Keeffe EB, Dieterich DT, Han SH, et al. A treatment algorithm for the management of chronic hepatitis B virus infection in the United States: 2008 update. *Clinical gastroenterology and hepatology : the official clinical practice journal of the American Gastroenterological Association* 2008; **6**(12): 1315-41; quiz 286.
21. McMahon BJ. The natural history of chronic hepatitis B virus infection. *Hepatology* 2009; **49**(5 Suppl): S45-55.
22. Nguyen VT, Law MG, Dore GJ. Hepatitis B-related hepatocellular carcinoma: epidemiological characteristics and disease burden. *Journal of viral hepatitis* 2009; **16**(7): 453-63.
23. Shepherd J, Jones J, Takeda A, Davidson P, Price A. Adefovir dipivoxil and pegylated interferon alfa-2a for the treatment of chronic hepatitis B: a systematic review and economic evaluation. *Health technology assessment (Winchester, England)* 2006; **10**(28): iii-iv, xi-xiv, 1-183.
24. Veldhuijzen IK, Toy M, Hahne SJ, et al. Screening and early treatment of migrants for chronic hepatitis B virus infection is cost-effective. *Gastroenterology* 2010; **138**(2): 522-30.
25. Ting-Tsung C, G GR, Robert dM, et al. A comparison of entecavir and lamivudine for HBeAg-positive chronic hepatitis B. *The New England Journal of Medicine* 2006; **354**(10).
26. Ching-Lung L, Daniel S, S LA, et al. Entecavir versus lamivudine for patients with HBeAg-negative chronic hepatitis B. *The New England Journal of Medicine* 2006; **354**(10).
27. Colonno RJ RR, Pokornowski K, et al. . Four-year assessment of entecavir resistance in nucleoside naïve and lamivudine refractory patients. . *J Hepatol* 2007; **46**(S294).
28. Wu CY, Lin JT, Ho HJ, et al. Association of nucleos(t)ide analogue therapy with reduced risk of hepatocellular carcinoma in patients with chronic hepatitis B: a nationwide cohort study. *Gastroenterology* 2014; **147**(1): 143-51.e5.
29. Xu Y, Zhang Y-G, Wang X, et al. Long-term antiviral efficacy of entecavir and liver histology improvement in Chinese patients with hepatitis B virus-related cirrhosis. *World J Gastroenterol* 2015; **21**(25): 7869-76.
30. Yan Wang TL, Zenglu Han, Yundong Qu, Chunlei Lin, Lei Wang, Baohua Yang. Incidence and predictors of hepatocellular carcinoma in Chinese hepatitis B virus-related cirrhotic patients receiving antiviral therapy: a retrospective cohort study. *International Journal of Clinical and Experimental Medicine* 2018; **11**(9).
31. Yip TC, Wong VW, Chan HL, Tse YK, Lui GC, Wong GL. Tenofovir Is Associated With Lower Risk of Hepatocellular Carcinoma Than Entecavir in Patients With Chronic HBV Infection in China. *Gastroenterology* 2020; **158**(1): 215-25.e6.
32. Tsai TY, Hung TH, Livneh H, Lin IH, Lu MC, Yeh CC. Chinese herbal medicine therapy and the risk of mortality for chronic hepatitis B patients with concurrent liver cirrhosis: a nationwide population-based cohort study. *Oncotarget* 2018; **9**(26): 18214-23.
33. Chang TT, Gish RG, de Man R, et al. A comparison of entecavir and lamivudine for HBeAg-positive chronic hepatitis B. *The New England journal of medicine* 2006; **354**(10): 1001-10.
34. Lai CL, Shouval D, Lok AS, et al. Entecavir versus lamivudine for patients with HBeAg-negative

- chronic hepatitis B. *The New England journal of medicine* 2006; **354**(10): 1011-20.
35. Colonno RJ RR, Pokornowski K, et al. . Four-year assessment of entecavir resistance in nucleoside naïve and lamivudine refractory patients. . *Journal of hepatology* 2007; **46**(294).
  36. Liaw YF, Sung JJ, Chow WC, et al. Lamivudine for patients with chronic hepatitis B and advanced liver disease. *The New England journal of medicine* 2004; **351**(15): 1521-31.
  37. Organ Transplantation Branch, Chinese Medical Doctor Association; Chinese Society of Organ Transplantation, Chinese Medical Association. The Chinese clinical practice guideline on liver transplantation for hepatocellular carcinoma (2018). 2018.
  38. Sun H-C, Xie L, Yang X-R, et al. Shanghai Score: A Prognostic and Adjuvant Treatment-evaluating System Constructed for Chinese Patients with Hepatocellular Carcinoma after Curative Resection. *Chin Med J (Engl)* 2017; **130**(22): 2650-60.
  39. Toy M, Salomon JA, Jiang H, et al. Population health impact and cost-effectiveness of monitoring inactive chronic hepatitis B and treating eligible patients in Shanghai, China. *Hepatology* 2014; **60**(1): 46-55.
  40. Levy AR, Kowdley KV, Iloeje U, et al. The impact of chronic hepatitis B on quality of life: a multinational study of utilities from infected and uninfected persons. *Value in health : the journal of the International Society for Pharmacoeconomics and Outcomes Research* 2008; **11**(3): 527-38.
  41. Pwu RF, Chan KA. Cost-effectiveness analysis of interferon-alpha therapy in the treatment of chronic hepatitis B in Taiwan. *Journal of the Formosan Medical Association = Taiwan yi zhi* 2002; **101**(9): 632-41.
  42. Lam ET, Lam CL, Lai CL, Yuen MF, Fong DY, So TM. Health-related quality of life of Southern Chinese with chronic hepatitis B infection. *Health and quality of life outcomes* 2009; **7**: 52.
  43. Che YH, You J, Chongsuvivatwong V, et al. Dynamics and liver disease specific aspects of quality of life among patients with chronic liver disease in Yunnan, China. *Asian Pacific journal of cancer prevention : APJCP* 2014; **15**(12): 4765-71.
  44. Jia YX, Cui FQ, Li L, et al. Comparison between the EQ-5D-5L and the EQ-5D-3L in patients with hepatitis B. *Quality of life research : an international journal of quality of life aspects of treatment, care and rehabilitation* 2014; **23**(8): 2355-63.
  45. Zhuang G, Zhang M, Liu Y, et al. Significant impairment of health-related quality of life in mainland Chinese patients with chronic hepatitis B: a cross-sectional survey with pair-matched healthy controls. *Health and quality of life outcomes* 2014; **12**: 101.
  46. Xiao Min WH, Zhang Wei, etc. Cost-effectiveness analysis of hepatitis B vaccination strategy for high risk adults in Beijing. *Chinese Journal of Disease Control & Prevention* 2015; **7**: 730-4.
  47. Qian Y, Xiaoling F, Xi Z, Chenggang J. Evaluation on Life Quality Utility Weight of Hepatitis B Patients with Different Disease Status. *Chinese Health Economics* 2016; (6): 70.
  48. Zhu D, Guo N, Wang J, et al. Socioeconomic inequality in Hepatitis B vaccination of rural adults in China. *Hum Vaccin Immunother* 2018; **14**(2): 464-70.
  49. University of Hong Kong-Shenzhen Hospital [National lists of essential medicines]. Shenzhen, 2020.
  50. Zhang S, Ma Q, Liang S, et al. Annual economic burden of hepatitis B virus-related diseases among hospitalized patients in twelve cities in China. *Journal of viral hepatitis* 2016; **23**(3): 202-10.
  51. Yingzi Ming QZ, Baoren Tu, Gangcheng Kong, Hao Li, Ying Niu, Bo Peng, Junhui Li, Meng Yu and Min Yang. Liver Transplantation in China. 2018.
  52. Wang Xin TH. Cost-effectiveness analysis of three immunosuppressive drugs in liver transplant

recipients. *China Pharmacy* 2005; **16**(15).

53. Amini A, Varsaneux O, Kelly H, et al. Diagnostic accuracy of tests to detect hepatitis B surface antigen: a systematic review of the literature and meta-analysis. *BMC infectious diseases* 2017; **17**(Suppl 1): 698.
54. Shivkumar S, Peeling R, Jafari Y, Joseph L, Pai NP. Rapid point-of-care first-line screening tests for hepatitis B infection: a meta-analysis of diagnostic accuracy (1980-2010). *The American journal of gastroenterology* 2012; **107**(9): 1306-13.
55. WHO. WHO guide to cost-effectiveness analysis. Geneva:World Health Organization, 2003.
56. Bill & Melinda Gates Foundation. Methods for economic evaluation project (MEEP): the Gates reference case. Seattle, WA: Bill & Melinda Gates Foundation, 2014.
57. Zhu D, Wang J, Wangen KR. Hepatitis B vaccination coverage rates among adults in rural China: are economic barriers relevant? *Vaccine* 2014; **32**(49): 6705-10.
58. Razavi-Shearer D, Gamkrelidze I, Nguyen MH, et al. Global prevalence, treatment, and prevention of hepatitis B virus infection in 2016: a modelling study. *The Lancet Gastroenterology & Hepatology* 2018; **3**(6): 383-403.
59. Fanqiang W, Quancheng Z, Fang W, Hongli W. Analysis of five quantitative test results of hepatitis B in 5739 pregnant women in Qinhuangdao. *Labeled Immunoassays and Clinical Medicine* 2014; **21**(06): 696-7+700.
60. Fengrui C, Simei F, Xin T, et al. Investigation and analysis on serum epidemiology of hepatitis B in different years in Jilin Province, China. *Chinese Journal of Biologicals* 2016; **29**(07): 725-8+32.
61. Shishen W, Yuhui T, Yuchun T, et al. Epidemiological study of hepatitis B and hepatitis C infections in Northeastern China and the beneficial effect of the vaccination strategy for hepatitis B: a cross-sectional study. *BMC Public Health* 2018; **18**(1).
62. Hao GY, Xing FD, Jin X, et al. The prevalence of hepatitis B infection in central China: An adult population-based serological survey of a large sample size. *Journal of Medical Virology* 2017; **89**(3).
63. Yonghao G, Jun L, Pumei D, et al. Serological survey of hepatitis B at national disease surveillance sites in Henan Province in 2014. *Chinese Journal of Preventive Medicine* 2016; **50**(03): 279-81.
64. Lin L, Zhengrong D, Yi K, et al. Serological Epidemiology Analysis of the Hepatitis B Virus Infection in Yunnan Province. *Chinese Journal of Vaccines and Immunization* 2011; **17**(01): 33-7.
65. Zhixin X, Shubo L, Kun G, et al. Investigation of Related Knowledge and Behavior of Viral Hepatitis among Food and Public Places Personnel in Changping District of Beijing City. *Occupation and Health* 2008; (21): 2298-9.
66. Zhang Y-q, Bian S-n, Liu X-q, et al. Positive Rate of Different Hepatitis B Virus Serological Markers in Peking Union Medical College Hospital, a General Tertiary Hospital in Beijing. *Chinese Medical Sciences Journal* 2016; **31**(01): 17-22.
67. Hongrui R. Detection results of hepatitis B two half-and-half among 4 039 cases of pre-pregnancy eugenics examination couples. *Occupation and Health* 2019; **35**(10): 1419-21.
68. Li Z, Aiqiang X, Bingyu Y, et al. Analysis on Hepatitis B Vaccine Coverage among the Population of 1 ~ 59 Years Old in Shandong Province. *Chinese Journal of Vaccines and Immunization* 2009; **15**(02): 159-62.
69. Yanyan W, Wei Z, Zheng Z, et al. Community-based epidemiological survey of adult hepatitis B in Chaoyang District, Beijing. *Chinese Journal of Epidemiology* 2015; **36**(10): 1104-8.
70. Fuqiang C, Xiaohong G, Yuansheng C, et al. Vaccination Progress of Hepatitis B Vaccine and

- Epidemiology Changes of Carrying Rate of Hepatitis B Surface Antigen by Province in China, 1992-2006. *Chinese Journal of Vaccines and Immunization* 2012; **18**(01): 6-13.
71. Haiyan H, Ying Z, Weishen W, Chao L, Ailan S. Seroepidemiology of hepatitis B in healthy population in Tianjin, 2010. *Disease Surveillance* 2011; **26**(12): 939-42.
  72. Fanqiang W, Quancheng Z, Yaqi L. Analysis of Quantitative Test Results of Five Indexes of Hepatitis B for 10499 Different Cases in Qinhuangdao. *Labeled Immunoassays and Clinical Medicine* 2015; **22**(04): 310-2+6.
  73. Dingyu M, Wenyong H, Jingyuan Y, et al. Prevalence pattern of hepatitis B among minority population in Guizhou Province. *Modern Preventive Medicine* 2016; **043**(001): 11-4,48.
  74. Yuling L, Jichun W. Infection Status Survey of Hepatitis B Virus in Shenyang Citizens. *Journal of Microbiology* 2012; **32**(04): 103-5.
  75. Yujie M, Fang B, Jianing S, Zhaodan S, Crane Y, Xue Z. Seroepidemiological analysis of viral hepatitis B among healthy people in Heilongjiang Province. *Chinese Journal of Public Health* 2017; **33**(10): 1485-8.
  76. Shihong Y, Dan X, Yinan H, Yue Y. Analysis on the distribution characteristics of hepatitis B surface antigen antibodies in the population of 0-60 years old in Dalian. *Journal of Medical Pest Control* 2015; **31**(09): 1045-6+9.
  77. Hong R, Xin Z, Jian L, Yanting L, Yang S, Jiayu H. Seroepidemiological analysis on hepatitis B virus infection among community residents in Shanghai. *Chinese Journal of Public Health* 2013; **29**(11): 1568-71.
  78. Fangyan S, Ziyi J, Feng L. Sampling survey of hepatitis B seroepidemiology among people over 1 year old in Jiangyin City. *Practical Preventive Medicine* 2015; **22**(03): 328-30.
  79. Juan W, Yonghai D, Fuyang G, et al. A prevalence and knowledge survey on hepatitis B among population in rural areas in a city of Anhui Province. *Chinese Journal of Disease Control & Prevention* 2010; **14**(08): 697-700.
  80. Lifang H, Yong Z, Xiuhui Y, Dongjuan Z. Epidemiological characteristics of hepatitis B infection among people aged 1-29 years in Fujian Province. *Strait Journal of Preventive Medicine* 2018; **24**(03): 32-3.
  81. Wanshen G, Qian L, Yonghao G, et al. Seroepidemiological survey of adult viral hepatitis B in Henan Province in 2012. *Journal of Zhengzhou University(Medical Sciences)* 2014; **49**(01): 53-9.
  82. Jun L, Qing C, Jie L, willow, Yang H. Seroepidemiological survey of hepatitis B in couples planning pregnancy in Chongqing in 2013. *Chinese Journal of Clinical Infectious Diseases* 2014; **7**(06): 506-10.
  83. Haijun L, essential T, Yuanyuan Y, et al. Analysis of the current status of carrying hepatitis B surface antigen in the population of Ningxia in 2010. *Ningxia Medical Journal* 2014; **36**(01): 78-80.
  84. Cui F, Shen L, Li L, et al. Prevention of Chronic Hepatitis B after 3 Decades of Escalating Vaccination Policy, China. *Emerging Infectious Disease journal* 2017; **23**(5): 765.

## **Consolidated Health Economic Evaluation Reporting Standards (CHEERS) Checklist**

### **Items to include when reporting economic evaluations of health interventions**

The **ISPOR CHEERS Task Force Report**, *Consolidated Health Economic Evaluation Reporting Standards (CHEERS)—Explanation and Elaboration: A Report of the ISPOR Health Economic Evaluations Publication Guidelines Good Reporting Practices Task Force*, provides examples and further discussion of the 24-item CHEERS Checklist and the CHEERS Statement. It may be accessed via the *Value in Health* or via the ISPOR Health Economic Evaluation Publication Guidelines – CHEERS: Good Reporting Practices webpage:

<http://www.ispor.org/TaskForces/EconomicPubGuidelines.asp>

| <b>Section</b>                  | <b>Item No</b> | <b>Recommendation</b>                                                                                                                                                                   | <b>Reported on page No/line No</b> |
|---------------------------------|----------------|-----------------------------------------------------------------------------------------------------------------------------------------------------------------------------------------|------------------------------------|
| <b>Title and Abstract</b>       |                |                                                                                                                                                                                         |                                    |
| Title                           | 1              | Identify the study as an economic evaluation or use more specific terms such as “cost-effectiveness analysis”, and describe the interventions compared.                                 | 1                                  |
| Abstract                        | 2              | Provide a structured summary of objectives, perspective, setting, methods (including study design and inputs), results (including base case and uncertainty analyses), and conclusions. | 3                                  |
| <b>Introduction</b>             |                |                                                                                                                                                                                         |                                    |
| Background and objectives       | 3              | Provide an explicit statement of the broader context for the study. Present the study question and its relevance for health policy or practice decisions.                               | 5                                  |
| <b>Methods</b>                  |                |                                                                                                                                                                                         |                                    |
| Target population and subgroups | 4              | Describe characteristics of the base case population and subgroups analysed, including why they were chosen.                                                                            | 6                                  |
| Setting and location            | 5              | State relevant aspects of the system(s) in which the decision(s) need(s) to be made.                                                                                                    | 6                                  |
| Study perspective               | 6              | Describe the perspective of the study and relate this to the costs being evaluated.                                                                                                     | 6                                  |
| Comparators                     | 7              | Describe the interventions or strategies being compared and state why they were chosen.                                                                                                 | 7                                  |
| Time horizon                    | 8              | State the time horizon(s) over which costs and consequences are being evaluated and say why appropriate.                                                                                | 6-7                                |

|                                                        |     |                                                                                                                                                                                                                                                                                                                              |                  |
|--------------------------------------------------------|-----|------------------------------------------------------------------------------------------------------------------------------------------------------------------------------------------------------------------------------------------------------------------------------------------------------------------------------|------------------|
| Discount rate                                          | 9   | Report the choice of discount rate(s) used for costs and outcomes and say why appropriate.                                                                                                                                                                                                                                   | 8                |
| Choice of health outcomes                              | 10  | Describe what outcomes were used as the measure(s) of benefit in the evaluation and their relevance for the type of analysis performed.                                                                                                                                                                                      | 7-8              |
| Measurement of effectiveness                           | 11a | <i>Single study-based estimates</i> : Describe fully the design features of the single effectiveness study and why the single study was a sufficient source of clinical effectiveness data.                                                                                                                                  | N/A              |
|                                                        | 11b | <i>Synthesis-based estimates</i> : Describe fully the methods used for identification of included studies and synthesis of clinical effectiveness data.                                                                                                                                                                      | 6-7<br>Figure S2 |
| Measurement and valuation of preference based outcomes | 12  | If applicable, describe the population and methods used to elicit preferences for outcomes.                                                                                                                                                                                                                                  | 8                |
| Estimating resources and costs                         | 13a | <i>Single study-based economic evaluation</i> : Describe approaches used to estimate resource use associated with the alternative interventions. Describe primary or secondary research methods for valuing each resource item in terms of its unit cost. Describe any adjustments made to approximate to opportunity costs. | N/A              |
|                                                        | 13b | <i>Model-based economic evaluation</i> : Describe approaches and data sources used to estimate resource use associated with model health states. Describe primary or secondary research methods for valuing each resource item in terms of its unit cost. Describe any adjustments made to approximate to opportunity costs. | 7                |
| Currency, price date, and conversion                   | 14  | Report the dates of the estimated resource quantities and unit costs. Describe methods for adjusting estimated unit costs to the year of reported costs if necessary. Describe methods for converting costs into a common currency base and the exchange rate.                                                               | 6<br>Table 1     |
| Choice of model                                        | 15  | Describe and give reasons for the specific type of decision-analytical model used. Providing a figure to show model structure is strongly recommended.                                                                                                                                                                       | 6<br>Figure S1   |
| Assumptions                                            | 16  | Describe all structural or other assumptions underpinning the decision-analytical model.                                                                                                                                                                                                                                     | 6–8              |
| Analytical methods                                     | 17  | Describe all analytical methods supporting the                                                                                                                                                                                                                                                                               | 6–8              |

|                                                                      |     |                                                                                                                                                                                                                                                                                                        |                              |
|----------------------------------------------------------------------|-----|--------------------------------------------------------------------------------------------------------------------------------------------------------------------------------------------------------------------------------------------------------------------------------------------------------|------------------------------|
|                                                                      |     | evaluation. This could include methods for dealing with skewed, missing, or censored data; extrapolation methods; methods for pooling data; approaches to validate or make adjustments (such as half cycle corrections) to a model; and methods for handling population heterogeneity and uncertainty. |                              |
| <b>Results</b>                                                       |     |                                                                                                                                                                                                                                                                                                        |                              |
| Study parameters                                                     | 18  | Report the values, ranges, references, and, if used, probability distributions for all parameters. Report reasons or sources for distributions used to represent uncertainty where appropriate. Providing a table to show the input values is strongly recommended.                                    | Table 1<br>Figure S2         |
| Incremental costs and outcomes                                       | 19  | For each intervention, report mean values for the main categories of estimated costs and outcomes of interest, as well as mean differences between the comparator groups. If applicable, report incremental cost-effectiveness ratios.                                                                 | 8-10<br>Figure 1<br>Table S1 |
| Characterizing uncertainty                                           | 20a | <i>Single study-based economic evaluation:</i> Describe the effects of sampling uncertainty for the estimated incremental cost and incremental effectiveness parameters, together with the impact of methodological assumptions (such as discount rate, study perspective).                            | N/A                          |
|                                                                      | 20b | <i>Model-based economic evaluation:</i> Describe the effects on the results of uncertainty for all input parameters, and uncertainty related to the structure of the model and assumptions.                                                                                                            | 10<br>Figure 2<br>Figure S3  |
| Characterizing heterogeneity                                         | 21  | If applicable, report differences in costs, outcomes, or cost-effectiveness that can be explained by variations between subgroups of patients with different baseline characteristics or other observed variability in effects that are not reducible by more information.                             | 9-10<br>Table 2              |
| <b>Discussion</b>                                                    |     |                                                                                                                                                                                                                                                                                                        |                              |
| Study findings, limitations, generalizability, and current knowledge | 22  | Summarise key study findings and describe how they support the conclusions reached. Discuss limitations and the generalisability of the findings and how the findings fit with current knowledge.                                                                                                      | 10–12                        |
| <b>Other</b>                                                         |     |                                                                                                                                                                                                                                                                                                        |                              |
| Source of funding                                                    | 23  | Describe how the study was funded and the role of the funder in the identification, design, conduct, and reporting of the analysis. Describe other non-monetary                                                                                                                                        | 2                            |



|                       |    |                                                                                                                                                                                                                                                   |   |
|-----------------------|----|---------------------------------------------------------------------------------------------------------------------------------------------------------------------------------------------------------------------------------------------------|---|
|                       |    | sources of support.                                                                                                                                                                                                                               |   |
| Conflicts of interest | 24 | Describe any potential for conflict of interest of study contributors in accordance with journal policy. In the absence of a journal policy, we recommend authors comply with International Committee of Medical Journal Editors recommendations. | 2 |

For consistency, the CHEERS Statement checklist format is based on the format of the CONSORT statement checklist

The **ISPOR CHEERS Task Force Report** provides examples and further discussion of the 24-item CHEERS Checklist and the CHEERS Statement. It may be accessed via the *Value in Health* link or via the ISPOR Health Economic Evaluation Publication Guidelines – CHEERS: Good Reporting Practices webpage: <http://www.ispor.org/TaskForces/EconomicPubGuidelines.asp>

The citation for the CHEERS Task Force Report is: Husereau D, Drummond M, Petrou S, et al. Consolidated health economic evaluation reporting standards (CHEERS)—Explanation and elaboration: A report of the ISPOR health economic evaluations publication guidelines good reporting practices task force. *Value Health* 2013; 16:231–50.
